# Supplementary material
Source: PubMed Central journal article supplement (PMC3819400)
Supplement: NIHMS523980-supplement-1_si_001.pdf [file NIHMS523980-supplement-1_si_001.pdf]

# On-Line Supporting Information

## Silver Nanoparticles Incite Size and Dose-Dependent Developmental Phenotypes and Nanotoxicity in Zebrafish Embryos

Lauren M. Browning, Kerry J. Lee, Prakash D. Nallathamby, and Xiao-Hong Nancy Xu\*

*Department of Chemistry and Biochemistry, Old Dominion University, Norfolk, VA 23529*

The on-line supporting information includes:

**Table SI:** Summary of normal and deformed zebrafish developed from given-stage embryos acutely treated with the Ag NPs ( $97 \pm 13$  nm) for 2 h

---

\* To whom correspondence should be addressed: Email: [xhxu@odu.edu](mailto:xhxu@odu.edu); [www.odu.edu/sci/xu/xu.htm](http://www.odu.edu/sci/xu/xu.htm); Tel/fax: (757) 683-5698

**Table S1: Summary of normal and deformed zebrafish developed from given-stage embryos acutely treated with the Ag NPs (97 ± 13 nm) for 2 h**

| NP C (pM)      | Images of Zebrafish                                                                 |                                                                                     |                                                                                     |                                                                                     | Number of Zebrafish with Severity Scale*                                             |   |   |   |    | Dead |                                                                                       |
|----------------|-------------------------------------------------------------------------------------|-------------------------------------------------------------------------------------|-------------------------------------------------------------------------------------|-------------------------------------------------------------------------------------|--------------------------------------------------------------------------------------|---|---|---|----|------|---------------------------------------------------------------------------------------|
|                |                                                                                     |                                                                                     |                                                                                     |                                                                                     | 0                                                                                    | 1 | 2 | 3 | 4  |      |                                                                                       |
| <b>Stage I</b> |                                                                                     |                                                                                     |                                                                                     |                                                                                     |                                                                                      |   |   |   |    |      |                                                                                       |
| 0              | Control: Normal Development                                                         |                                                                                     |                                                                                     |                                                                                     | 45±0                                                                                 |   |   |   |    |      | 3±0                                                                                   |
|                | 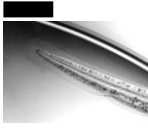   |    |    |                                                                                     |                                                                                      |   |   |   |    |      |    |
| 2              | Finfold Abnormality*                                                                |                                                                                     |                                                                                     |                                                                                     | 38±3                                                                                 |   | 1 |   |    |      | 7±1                                                                                   |
|                |    |                                                                                     |                                                                                     |                                                                                     |                                                                                      |   |   |   |    |      |    |
|                | Tail/Spinal Cord Flexure and Truncation*                                            |                                                                                     |                                                                                     |                                                                                     |                                                                                      |   |   | 1 |    |      |                                                                                       |
|                |   |                                                                                     |                                                                                     |                                                                                     |                                                                                      |   |   |   |    |      |                                                                                       |
| 4              | Finfold Abnormality*                                                                |                                                                                     |                                                                                     |                                                                                     | 19±2                                                                                 |   | 1 | 1 | 3  |      | 21±2                                                                                  |
|                |  |  |  |  |  |   |   |   |    |      |  |
|                | Tail/Spinal Cord Flexure and Truncation*                                            |                                                                                     |                                                                                     |                                                                                     |                                                                                      | 2 |   | 1 |    |      |                                                                                       |
|                |  |  |  |                                                                                     |                                                                                      |   |   |   |    |      |                                                                                       |
|                | Cardiac Malformation/Edema***, Yolk Sac Edema***                                    |                                                                                     |                                                                                     |                                                                                     |                                                                                      |   |   |   | 1♦ |      |                                                                                       |
|                |  |                                                                                     |                                                                                     |                                                                                     |                                                                                      |   |   |   |    |      |                                                                                       |
|                | Cardiac Malformation/Edema***, Yolk Sac Edema***, Eye Abnormality***                |                                                                                     |                                                                                     |                                                                                     |                                                                                      |   |   |   | 1♦ |      |                                                                                       |
|                |  |                                                                                     |                                                                                     |                                                                                     |                                                                                      |   |   |   |    |      |                                                                                       |

|          |                                                                                                                                  |                                                                                     |                                                                                   |      |  |   |  |                |                                                                                       |
|----------|----------------------------------------------------------------------------------------------------------------------------------|-------------------------------------------------------------------------------------|-----------------------------------------------------------------------------------|------|--|---|--|----------------|---------------------------------------------------------------------------------------|
|          | Cardiac Malformation/Edema <sup>**</sup> , Yolk Sac Edema <sup>**</sup> , Head Abnormality <sup>**</sup> , No Eyes <sup>**</sup> |                                                                                     |                                                                                   |      |  |   |  | 1 <sup>♦</sup> |                                                                                       |
|          |                                                 |                                                                                     |                                                                                   |      |  |   |  |                |                                                                                       |
|          | <b>Stage II</b>                                                                                                                  |                                                                                     |                                                                                   |      |  |   |  |                |                                                                                       |
| <b>0</b> | Control: Normal Development                                                                                                      |                                                                                     |                                                                                   | 44±1 |  |   |  |                | 4±1                                                                                   |
|          |                                                 |    |  |      |  |   |  |                |    |
| <b>2</b> | Finfold Abnormality <sup>*</sup>                                                                                                 |                                                                                     |                                                                                   | 24±2 |  | 1 |  | 1              | 15±2                                                                                  |
|          |                                                 |    |                                                                                   |      |  |   |  |                |    |
|          | Tail/Spinal Cord Flexure and Truncation <sup>*</sup>                                                                             |                                                                                     |                                                                                   |      |  | 1 |  | 1              |                                                                                       |
|          |                                                |   |                                                                                   |      |  |   |  |                |                                                                                       |
|          | Cardiac Malformation/Edema <sup>**</sup> , Yolk Sac Edema <sup>**</sup> , Eye Abnormality <sup>**</sup>                          |                                                                                     |                                                                                   |      |  |   |  | 1 <sup>♦</sup> |                                                                                       |
|          |                                               |                                                                                     |                                                                                   |      |  |   |  |                |                                                                                       |
| <b>4</b> | Finfold Abnormality <sup>*</sup>                                                                                                 |                                                                                     |                                                                                   | 25±3 |  | 1 |  | 1              | 17±2                                                                                  |
|          |                                               |  |                                                                                   |      |  |   |  |                |  |
|          | Tail/Spinal Cord Flexure and Truncation <sup>*</sup>                                                                             |                                                                                     |                                                                                   |      |  | 1 |  | 1              |                                                                                       |
|          |                                               |  |                                                                                   |      |  |   |  |                |                                                                                       |
|          | Cardiac Malformation/Edema <sup>**</sup> and Yolk Sac Edema <sup>**</sup>                                                        |                                                                                     |                                                                                   |      |  |   |  | 1 <sup>♦</sup> |                                                                                       |
|          |                                               |                                                                                     |                                                                                   |      |  |   |  |                |                                                                                       |

|           |                                                                                                         |                                                                                     |      |  |   |   |                |                                                                                       |
|-----------|---------------------------------------------------------------------------------------------------------|-------------------------------------------------------------------------------------|------|--|---|---|----------------|---------------------------------------------------------------------------------------|
|           | Cardiac Malformation/Edema <sup>**</sup> , Eye Abnormality <sup>**</sup> , Yolk Sac Edema <sup>**</sup> |                                                                                     |      |  |   |   | 1 <sup>♦</sup> |                                                                                       |
|           |                        |                                                                                     |      |  |   |   |                |                                                                                       |
| <b>8</b>  | Finfold Abnormality <sup>*</sup>                                                                        |                                                                                     | 14±2 |  | 1 | 1 |                | 28±2                                                                                  |
|           |                        |    |      |  |   |   |                |    |
|           | Tail/Spinal Cord Flexure and Truncation <sup>*</sup>                                                    |                                                                                     |      |  | 1 | 1 |                |                                                                                       |
|           |                        |    |      |  |   |   |                |                                                                                       |
|           | Cardiac Malformation/Edema <sup>**</sup> and Yolk Sac Edema <sup>**</sup>                               |                                                                                     |      |  |   |   | 1 <sup>♦</sup> |                                                                                       |
|           |                        |                                                                                     |      |  |   |   |                |                                                                                       |
| <b>16</b> | Finfold Abnormality <sup>*</sup>                                                                        |                                                                                     | 5±1  |  | 1 | 1 |                | 38±2                                                                                  |
|           |                      |  |      |  |   |   |                |  |
|           | Tail/Spinal Cord Flexure and Truncation <sup>*</sup>                                                    |                                                                                     |      |  | 1 |   | 1              |                                                                                       |
|           |                      |  |      |  |   |   |                |                                                                                       |
|           | Cardiac Malformation/Edema <sup>**</sup> and Yolk Sac Edema <sup>**</sup>                               |                                                                                     |      |  |   |   | 1 <sup>♦</sup> |                                                                                       |
|           |                      |                                                                                     |      |  |   |   |                |                                                                                       |
|           | Cardiac Malformation/Edema <sup>**</sup> , Eye Abnormality <sup>**</sup> , Yolk Sac Edema <sup>**</sup> |                                                                                     |      |  |   |   | 1 <sup>♦</sup> |                                                                                       |
|           |                      |                                                                                     |      |  |   |   |                |                                                                                       |

|    |                                                                                     |                                                                                     |                                                                                     |      |   |  |    |   |                                                                                       |
|----|-------------------------------------------------------------------------------------|-------------------------------------------------------------------------------------|-------------------------------------------------------------------------------------|------|---|--|----|---|---------------------------------------------------------------------------------------|
| 24 | Finfold Abnormality*                                                                |                                                                                     |                                                                                     | 6±2  | 1 |  |    | 1 | 37±3                                                                                  |
|    | 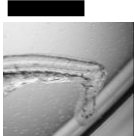   |    |                                                                                     |      |   |  |    |   |    |
|    | Tail/Spinal Cord Flexure and Truncation*                                            |                                                                                     |                                                                                     |      |   |  | 2  |   |                                                                                       |
|    |    |    |                                                                                     |      |   |  |    |   |                                                                                       |
|    | Cardiac Malformation/Edema**                                                        |                                                                                     |                                                                                     |      |   |  | 1♦ |   |                                                                                       |
|    |    |    |                                                                                     |      |   |  |    |   |                                                                                       |
|    | Yolk Sac Edema**, Eye Abnormality**, Head Abnormality**                             |                                                                                     |                                                                                     |      |   |  | 1♦ |   |                                                                                       |
|    |   |                                                                                     |                                                                                     |      |   |  |    |   |                                                                                       |
|    | <b>Stage III</b>                                                                    |                                                                                     |                                                                                     |      |   |  |    |   |                                                                                       |
|    | Control: Normal Development                                                         |                                                                                     |                                                                                     | 42±0 |   |  |    |   | 6±0                                                                                   |
|    |  |  |  |      |   |  |    |   |  |
|    | Finfold Abnormality*                                                                |                                                                                     |                                                                                     | 12±2 |   |  |    | 1 | 34±2                                                                                  |
|    |  |                                                                                     |                                                                                     |      |   |  |    |   |  |
|    | Tail/Spinal Cord Flexure and Truncation*                                            |                                                                                     |                                                                                     |      |   |  | 1  |   |                                                                                       |
|    |  |                                                                                     |                                                                                     |      |   |  |    |   |                                                                                       |
|    | Cardiac Malformation/Edema**, Eye Abnormality**, Yolk Sac Edema**                   |                                                                                     |                                                                                     |      |   |  | 1♦ |   |                                                                                       |

|                 |                                                                                     |                                                                                     |                                                                                     |  |  |  |  |      |                                                                                       |     |
|-----------------|-------------------------------------------------------------------------------------|-------------------------------------------------------------------------------------|-------------------------------------------------------------------------------------|--|--|--|--|------|---------------------------------------------------------------------------------------|-----|
|                 | 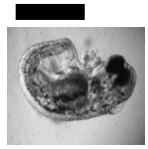   |                                                                                     |                                                                                     |  |  |  |  |      |                                                                                       |     |
| <b>Stage IV</b> |                                                                                     |                                                                                     |                                                                                     |  |  |  |  |      |                                                                                       |     |
| <b>0</b>        | Control: Normal Development                                                         |                                                                                     |                                                                                     |  |  |  |  | 45±0 |                                                                                       | 3±0 |
|                 |    |    |    |  |  |  |  |      |    |     |
| <b>4</b>        | Finfold Abnormality*                                                                |                                                                                     |                                                                                     |  |  |  |  | 43±3 | 2                                                                                     | 4±4 |
|                 |    |    |                                                                                     |  |  |  |  |      |    |     |
|                 | Tail/Spinal Cord Flexure and Truncation*                                            |                                                                                     |                                                                                     |  |  |  |  |      | 2                                                                                     |     |
|                 |    |    |                                                                                     |  |  |  |  |      |                                                                                       |     |
|                 | Cardiac Malformation/Edema** , Eye Abnormality** , Yolk Sac Edema**                 |                                                                                     |                                                                                     |  |  |  |  |      |                                                                                       | 2*  |
|                 |  |  |                                                                                     |  |  |  |  |      |                                                                                       |     |
| <b>Stage V</b>  |                                                                                     |                                                                                     |                                                                                     |  |  |  |  |      |                                                                                       |     |
| <b>0</b>        | Control: Normal Development                                                         |                                                                                     |                                                                                     |  |  |  |  | 46±1 |                                                                                       | 2±1 |
|                 |  |  |  |  |  |  |  |      |  |     |
| <b>2</b>        | Finfold Abnormality*                                                                |                                                                                     |                                                                                     |  |  |  |  | 47±1 |                                                                                       | 2±1 |
|                 |  |                                                                                     |                                                                                     |  |  |  |  |      |  |     |
|                 | Tail/Spinal Cord Flexure and Truncation*                                            |                                                                                     |                                                                                     |  |  |  |  |      | 1                                                                                     |     |
|                 |  |                                                                                     |                                                                                     |  |  |  |  |      |                                                                                       |     |

|   |                                                                                   |                                                                                   |                                                                                   |      |   |   |    |  |                                                                                     |
|---|-----------------------------------------------------------------------------------|-----------------------------------------------------------------------------------|-----------------------------------------------------------------------------------|------|---|---|----|--|-------------------------------------------------------------------------------------|
| 8 | Finfold Abnormality*                                                              |                                                                                   |                                                                                   | 24±2 | 1 |   |    |  | 21±1                                                                                |
|   | 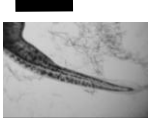 |                                                                                   |                                                                                   |      |   |   |    |  |  |
|   | Tail/Spinal Cord Flexure and Truncation*                                          |                                                                                   |                                                                                   |      |   | 1 |    |  |                                                                                     |
|   |  |                                                                                   |                                                                                   |      |   |   |    |  |                                                                                     |
|   | Cardiac Malformation/Edema** and Yolk Sac Edema**                                 |                                                                                   |                                                                                   |      |   |   | 3* |  |                                                                                     |
|   |  |  |  |      |   |   |    |  |                                                                                     |

\* We have developed and used our own scoring system, based upon the severe deviations from the normal development, to semi-quantitatively rank deformity from 0 (normal) to 4 or 3 (the severest of finfold and tail abnormality), respectively. All other deformities (e.g., yolk sac edema, cardiac malformation/Edema, eye abnormality, head abnormality, and no eyes) are rated as 4, because these deformities are typically accompanied with finfold and tail abnormality.

\* Multiple types of deformities observed in same zebrafish are repeatedly listed in the respective category.

≠ Rare type of deformities and their deformation severities are unable to be rated.

Scale bars = 500 μm
